# Supplementary material for: Recently recycled synaptic vesicles use multi-cytoskeletal transport and differential presynaptic capture probability to establish a retrograde net flux during ISVE in central neurons
Source: Front Cell Dev Biol. 2023 Nov 6;11:1286915. doi: 10.3389/fcell.2023.1286915 (PMC10657820; doi:10.3389/fcell.2023.1286915)
Supplement: Supplementary file 2 [file Table1.XLSX]

## Sheet: Sheet1
			Reagent type (species) or resource	Designation	Source or Reference	Identifiers	Additional Information
			Chemical compound, drug	DL-AP5 Sodium salt	Tocris	Cat. No. 3693
			Chemical compound, drug	CNQX disodium Salt	Tocris	Cat. No. 1045
			Chemical compound, drug	HEPES	Sigma	Cat. No. H4034
			Chemical compound, drug	D-(+)-Glucose	Sigma	Cat. No. G 7021
			Chemical compound, drug	Calcium chloride dihydrate	Sigma	Cat. No. 223506
			Chemical compound, drug	Magnesium chloride hexahydrate	Sigma	Cat. No. M9272
			Chemical compound, drug	Minimum Essential Media (MEM) - No Phenol Red	thermofisher	Cat. No. 51200-038
			Chemical compound, drug	Characterized Fetal Bovine Serum	hyclone	Cat. No. SH30071.03
			Chemical compound, drug	Penicillin- Streptomycin (5,000 U/mL)	thermofisher	Cat. No. 15070063
			Chemical compound, drug	N-2 Supplement (100X)	thermofisher	Cat. No. 17502048
			Chemical compound, drug	Donor Equine Serium	hyclone	Cat. No. SH30074.03
			Chemical compound, drug	Sodium Pyruvate (100 mM)	thermofisher	Cat. No. 11360–070
			Chemical compound, drug	Neurobasal- A Medium	thermofisher	Cat. No. 10888–022
			Chemical compound, drug	B-27 Supplement (50x), serum free	thermofisher	Cat. No. 17504–044
			Chemical compound, drug	GlutaMAX supplement	thermofisher	Cat. No. 35050061
			Chemical compound, drug	Earle’s Balanced Salts	sigmaaldrich	Cat. No. E3024
			Chemical compound, drug	Corning Collagen I, Rat	FISHER SCIENTIFIC	Cat. No. 354236
			Chemical compound, drug	Cover Glass	FISHER SCIENTIFIC	Cat. No. 12-545-80
			Chemical compound, drug	Papain	Worthington Biochemical	Cat. No. LS003126
			Chemical compound, drug	PDL (poly-D-lysine)	BD Biosciences	Cat. No. 40210
			Chemical compound, drug	Trypsin-EDTA (0.05%), phenol red	thermofisher	Cat. No. 25300–054
			Chemical compound, drug	Nocodazole	sigmaaldrich	Cat. No. M1404
			Chemical compound, drug	HEPES Buffer 1M solution	Corning	Cat. No. 25-060-CI
			Chemical compound, drug	SGC5	Biotium	Cat. No. 70057
			Chemical compound, drug	Latrunculin A	AbcamBiochemical	Cat. No. ab144290
			Chemical compound, drug	MyoVin-1	Sigma	Cat. No. 475984
			Chemical compound, drug	Pentabromopseudalin	Millipore Sigma	Cat. No. SML2428
			Chemical compound, drug	EGTA	Millipore Sigma	Cat. No. 324628
			Chemical compound, drug	Oleic Acid	Millipore Sigma	Cat. No. O1383
			Chemical compound, drug	CK-666	Millipore Sigma	Cat. No. SML0006
			Software, algorithm	MATLAB	MathWorks	RRID:SCR_001622
			Software, algorithm	ImageJ	https://imagej.nih.gov/ij/	RRID:SCR_003070
			Software, algorithm	Fiji	http://fiji.sc	RRID:SCR_002285
			Software, algorithm	inkscape		RRID:SCR_014479
			Other	VGluT1-	Drs. Robert		Genetically
				pHluorin	Edwards and		encoded optical
					Susan Voglmaier		indicator of vesicle
					(UCSF)		release and recycling
			Other	LentiBrite™ EB3-RFP Lentiviral Biosensor	Millipore Sigma	Cat. No. 17-10222	genetically encoded optical indicator of microtubule plus-end location
